# Supplementary material
Source: PubMed Central journal article supplement (PMC2577244)
Supplement: pp.108.125385_5.pdf [file pp.108.125385_5.pdf]

## SUPPLEMENTAL DATA

**Supplemental Table S1.** Overview of the effects of phytohormone treatment on Col-0 leaf parameters,  $\pm$  the standard error (n=6).

| Parameter                   | K1               | JA               | BAP              | GA3              |
|-----------------------------|------------------|------------------|------------------|------------------|
| <b>LEAF 4</b>               |                  |                  |                  |                  |
| Leaf area <sup>a</sup>      | 21.57 $\pm$ 0.99 | 21.46 $\pm$ 0.68 | 11.26 $\pm$ 0.61 | 21.22 $\pm$ 0.82 |
| Cells/leaf                  | 11509 $\pm$ 806  | 12935 $\pm$ 970  | 13285 $\pm$ 1123 | 12145 $\pm$ 2156 |
| Cell area <sup>b</sup>      | 1841 $\pm$ 94    | 1973 $\pm$ 902   | 986 $\pm$ 342    | 1910 $\pm$ 216   |
| Trichomes/leaf              | 41 $\pm$ 1       | 37 $\pm$ 1       | 43 $\pm$ 1       | 35 $\pm$ 1       |
| Trichome Index <sup>c</sup> | 0.37 $\pm$ 0.06  | 0.30 $\pm$ 0.05  | 0.34 $\pm$ 0.07  | 0.31 $\pm$ 0.08  |
| Stomata/leaf                | 3858 $\pm$ 206   | 3967 $\pm$ 69    | 4472 $\pm$ 60    | 3991 $\pm$ 61    |
| Stomatal Index <sup>c</sup> | 27.91 $\pm$ 1.49 | 28.70 $\pm$ 0.50 | 32.34 $\pm$ 0.43 | 28.87 $\pm$ 0.44 |
| <b>LEAF 7</b>               |                  |                  |                  |                  |
| Leaf area <sup>a</sup>      | 30.64 $\pm$ 0.64 | 28.03 $\pm$ 0.58 | 16.27 $\pm$ 0.55 | 35.50 $\pm$ 0.33 |
| Cells/leaf                  | 30657 $\pm$ 1156 | 31848 $\pm$ 1723 | 41088 $\pm$ 2306 | 25349 $\pm$ 823  |
| Cell area <sup>b</sup>      | 1020 $\pm$ 87    | 902 $\pm$ 98     | 342 $\pm$ 64     | 1420 $\pm$ 55    |
| Trichomes/leaf              | 136 $\pm$ 3      | 219 $\pm$ 5      | 253 $\pm$ 10     | 174 $\pm$ 3      |
| Trichome Index <sup>c</sup> | 0.43 $\pm$ 0.01  | 0.69 $\pm$ 0.03  | 0.65 $\pm$ 0.03  | 0.69 $\pm$ 0.02  |
| Stomata/leaf                | 4851 $\pm$ 283   | 4070 $\pm$ 589   | 5119 $\pm$ 262   | 4339 $\pm$ 280   |
| Stomatal Index <sup>c</sup> | 35.08 $\pm$ 2.05 | 33.55 $\pm$ 1.77 | 37.47 $\pm$ 1.90 | 28.87 $\pm$ 0.81 |

<sup>a</sup> in mm<sup>2</sup>

<sup>b</sup> in  $\mu$ m<sup>2</sup>

<sup>c</sup> The trichome and stomatal index are calculated by the formula: 100 x [number of trichomes (or stomata)] / [number of trichome (or stomata) + number of pavement and guard cells].

**Supplemental Table S2.** Trichome nuclear area parameters. Nuclear area and fluorescence intensity are indicated in  $\mu\text{m}^2$  and relative fluorescence units, respectively,  $\pm$  the standard error (n=10).

---

| Treatment | Nuclear area   | Fluorescence Intensity |
|-----------|----------------|------------------------|
| K1        | 25.8 $\pm$ 1.1 | 104832 $\pm$ 14590     |
| JA        | 49.1 $\pm$ 3.4 | 93939 $\pm$ 11837      |
| BAP       | 22.4 $\pm$ 1.0 | 77126 $\pm$ 18691      |
| GA3       | 24.7 $\pm$ 2.4 | 94203 $\pm$ 10161      |

---

**Figure S1.** Influence of the phytohormones JA, BAP, and GA3 on trichome development in Arabidopsis Col-0 and C24 seedlings. (A) Leaf 7 from Col-0, 14 days after phytohormone treatment. (B) Leaf 7 from C24, 14 days after phytohormone treatment.

**Figure S2.** Expression of R1-MYB genes in phytohormone-treated rosette leaves. *TRY*, *ETC1*, *ETC2* (A) and *CPC* (B) expression in the 7<sup>th</sup> and 8<sup>th</sup> leaf (pooled), 5 days after phytohormone treatment. Numbers in the ordinate give the fold-induction compared to that in the mock treatment (K1). Error bars represent the standard error (n=9).

**Figure S3.** Phytohormonal elicitation of leaf anthocyanin biosynthesis. (A) Anthocyanin accumulation, 14 days after phytohormone treatment. (B) *TT8*, *PAP1*, and *PAP2* expression in phytohormone-treated seedlings, 5 days after phytohormone treatment. Numbers on the ordinate give the Q-value calculated by the formula  $A_{530} - 0.33 A_{657}$  (A) and fold-induction compared to the mock treatment (K1) (B). Error bars represent the standard error (n=9). Statistical significance was determined by Student *t*-test (\*\* P<0.01, \* P<0.05).

**Figure S4.** Expression of bHLH genes in single bHLH mutants. Quantitative RT-PCR analysis of *TT8*, *GL3*, and *EGL3* expression in leaves (7 and 8) of wild-type and bHLH mutant plants, 5 days after phytohormone treatment. Numbers in the ordinate reflect the fold-induction in comparison to that of the wild-type plants (Col-0). Error bars represent the standard error (n=4).
