# Supplementary material
Source: PubMed Central journal article supplement (PMC2577244)

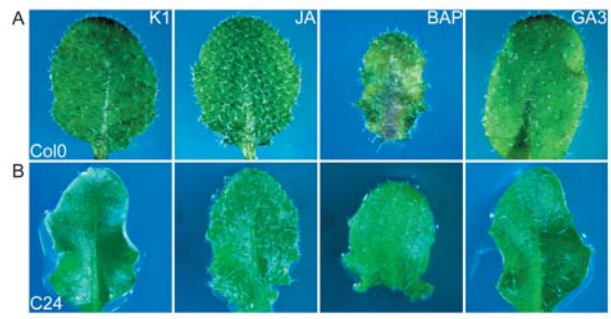

Supplement: pp.108.125385_1.pdf [file pp.108.125385_1.pdf]

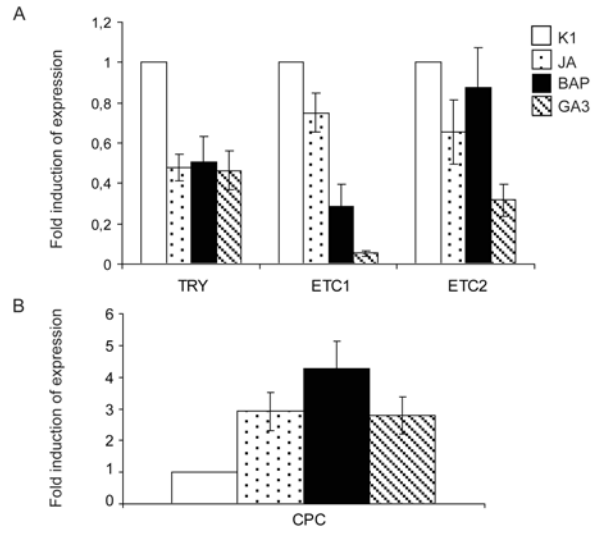

Supplement: pp.108.125385_2.pdf [file pp.108.125385_2.pdf]

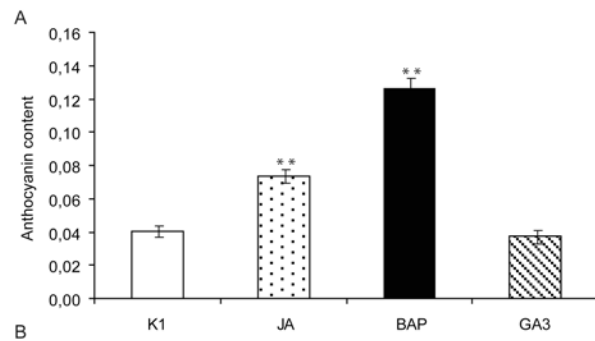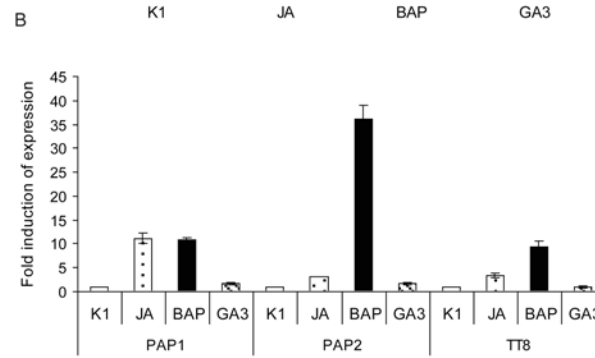

Supplement: pp.108.125385_3.pdf [file pp.108.125385_3.pdf]

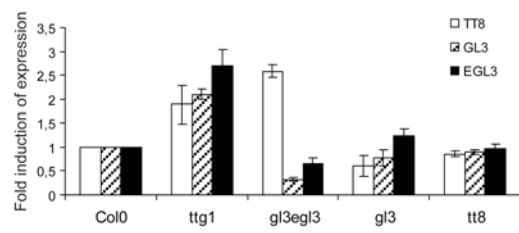

Supplement: pp.108.125385_4.pdf [file pp.108.125385_4.pdf]
